# Supplementary material for: Tet2 regulates Sin3a recruitment at active enhancers in embryonic stem cells
Source: PubMed Central journal article supplement — iScience. 2023 Jun 17;26(7):107170. doi: 10.1016/j.isci.2023.107170 (PMC10338317; doi:10.1016/j.isci.2023.107170), 2023-06-17
Supplement: mmc1.pdf [file mmc1.pdf]

**iScience, Volume 26**

**Supplemental information**

**Tet2 regulates Sin3a recruitment at active  
enhancers in embryonic stem cells**

**Julio C. Flores, Simone Sidoli, and Meelad M. Dawlaty**

A

| Sample                        | Reads      | Trimmed Reads | Unmapped Reads | Mapped Reads | Mapping Rate |
|-------------------------------|------------|---------------|----------------|--------------|--------------|
| <i>Tet2<sup>+/+</sup></i> (1) | 33,987,129 | 33,976,925    | 4,720,825      | 29,256,100   | 86.11 %      |
| <i>Tet2<sup>+/+</sup></i> (2) | 30,107,691 | 30,101,476    | 4,227,395      | 25,874,081   | 85.96 %      |
| <i>Tet2<sup>+/+</sup></i> (3) | 24,397,386 | 24,391,914    | 3,424,944      | 20,966,971   | 85.96 %      |
| <i>Tet2<sup>mm</sup></i> (1)  | 28,428,775 | 28,421,579    | 3,965,493      | 24,456,086   | 86.05 %      |
| <i>Tet2<sup>mm</sup></i> (2)  | 30,763,456 | 30,756,818    | 4,293,529      | 26,463,290   | 86.04 %      |
| <i>Tet2<sup>-/-</sup></i> (1) | 28,198,796 | 28,190,677    | 4,002,955      | 24,187,722   | 85.80 %      |
| <i>Tet2<sup>-/-</sup></i> (2) | 27,789,579 | 27,782,273    | 3,797,631      | 23,984,643   | 86.33 %      |

B

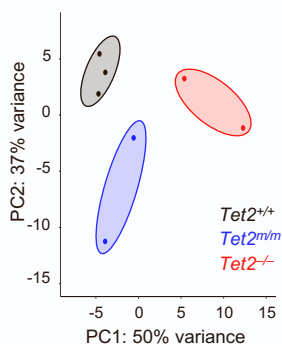

C

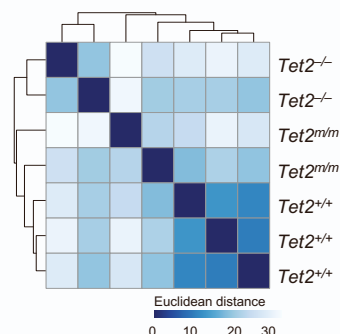

D

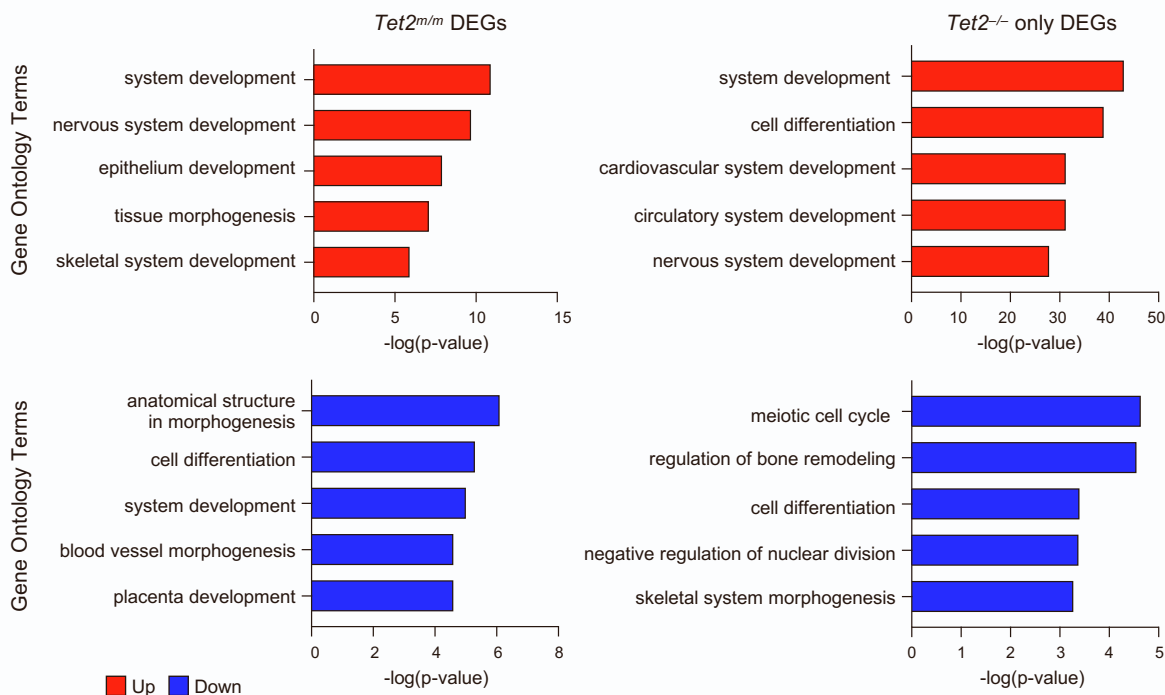

**Figure S1. Gene expression profiling of *Tet2<sup>mm</sup>* and *Tet2<sup>-/-</sup>* ESCs by RNA-seq, related to Figure 2.**

A. Summary of RNA-seq raw, trimmed, and mapped reads.

B. Principal component analysis (PCA) analysis of wildtype, *Tet2<sup>mm</sup>*, and *Tet2<sup>-/-</sup>* ESCs gene expression. Note that samples of the same genotype cluster together.

C. Distance plot showing clustering of normalized expression counts in wildtype, *Tet2<sup>mm</sup>*, and *Tet2<sup>-/-</sup>* ESCs.

D. Top significantly enriched gene ontology terms of up and downregulated DEGs ( $-\log$  of the p-value for each term is plotted).

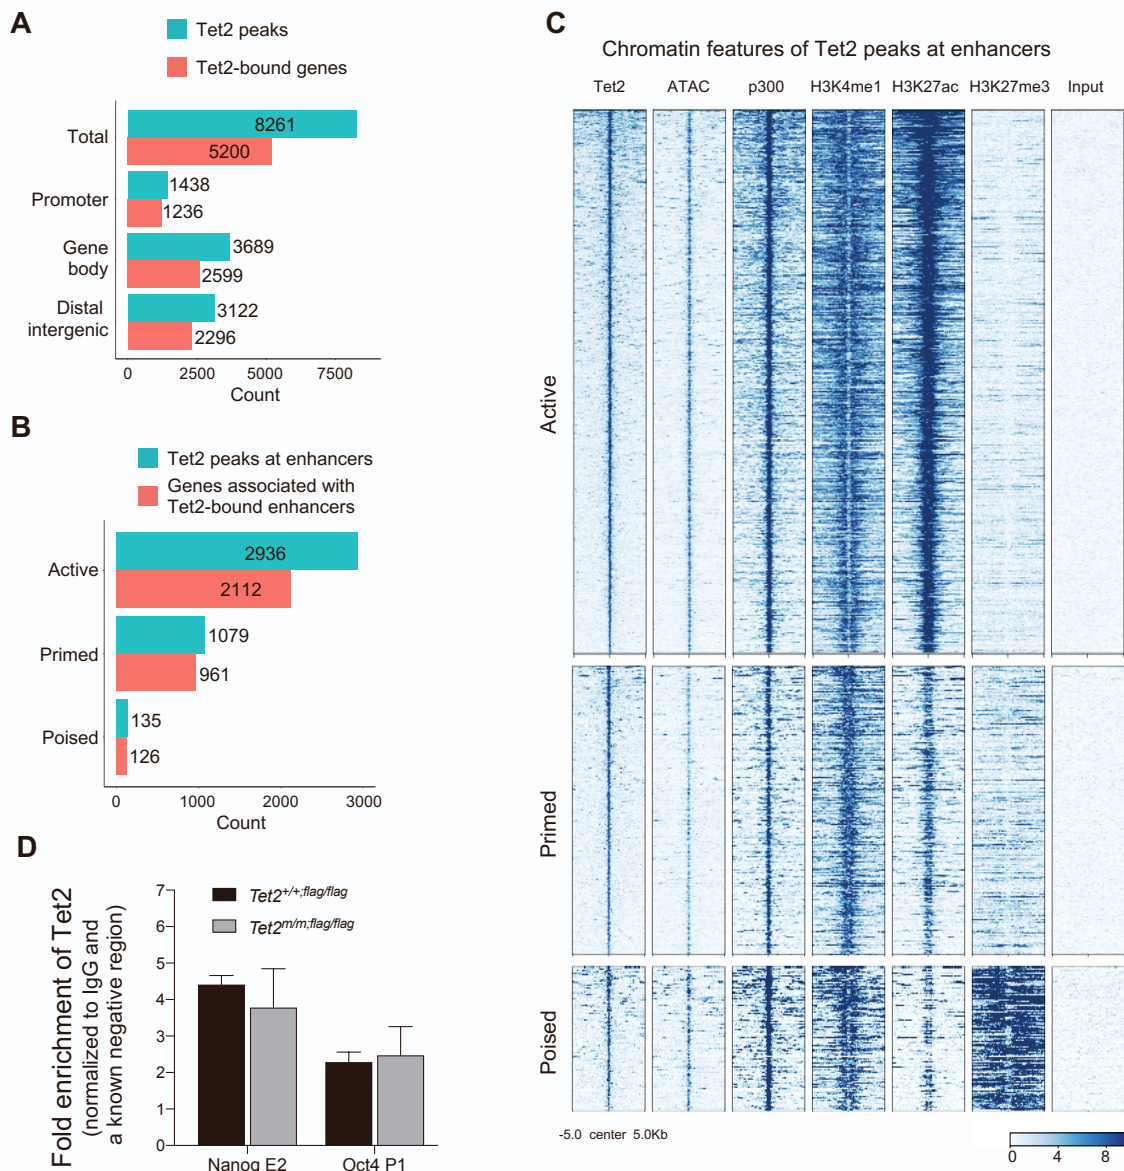

**Figure S2. Tet2 occupancy at enhancers in ESCs, related to Figure 2.**

- A. Number of Tet2 peaks at genomic regions, and the number of genes associated with Tet2 peaks (Tet2-bound genes) (Tet2 ChIP-seq data from Rasmussen et al., 2019).
- B. Number of Tet2 peaks at enhancers and the number of genes associated with them (enhancer coordinates from Cruz-Molina et al., 2017).
- C. Heatmap showing chromatin accessibility, p300 occupancy, and histone mark enrichment at Tet2-bound enhancers using previously published datasets (ATAC-seq data from Chronis et al., 2017; p300, H3K4me1, H3K27ac, and H3K27me3 ChIP-seq data from Cruz-Molina et al., 2017).
- D. Fold enrichment of wildtype and catalytic mutant Tet2 at *Nanog* enhancer 2 (E2) and *Oct4* promoter 1 (P1) in *Tet2*<sup>+/+</sup>;flag/flag and *Tet2*<sup>m/m</sup>;flag/flag ESCs quantified by ChIP-qPCR and normalized to IgG and a region negative for Tet2. Error bars=SD.

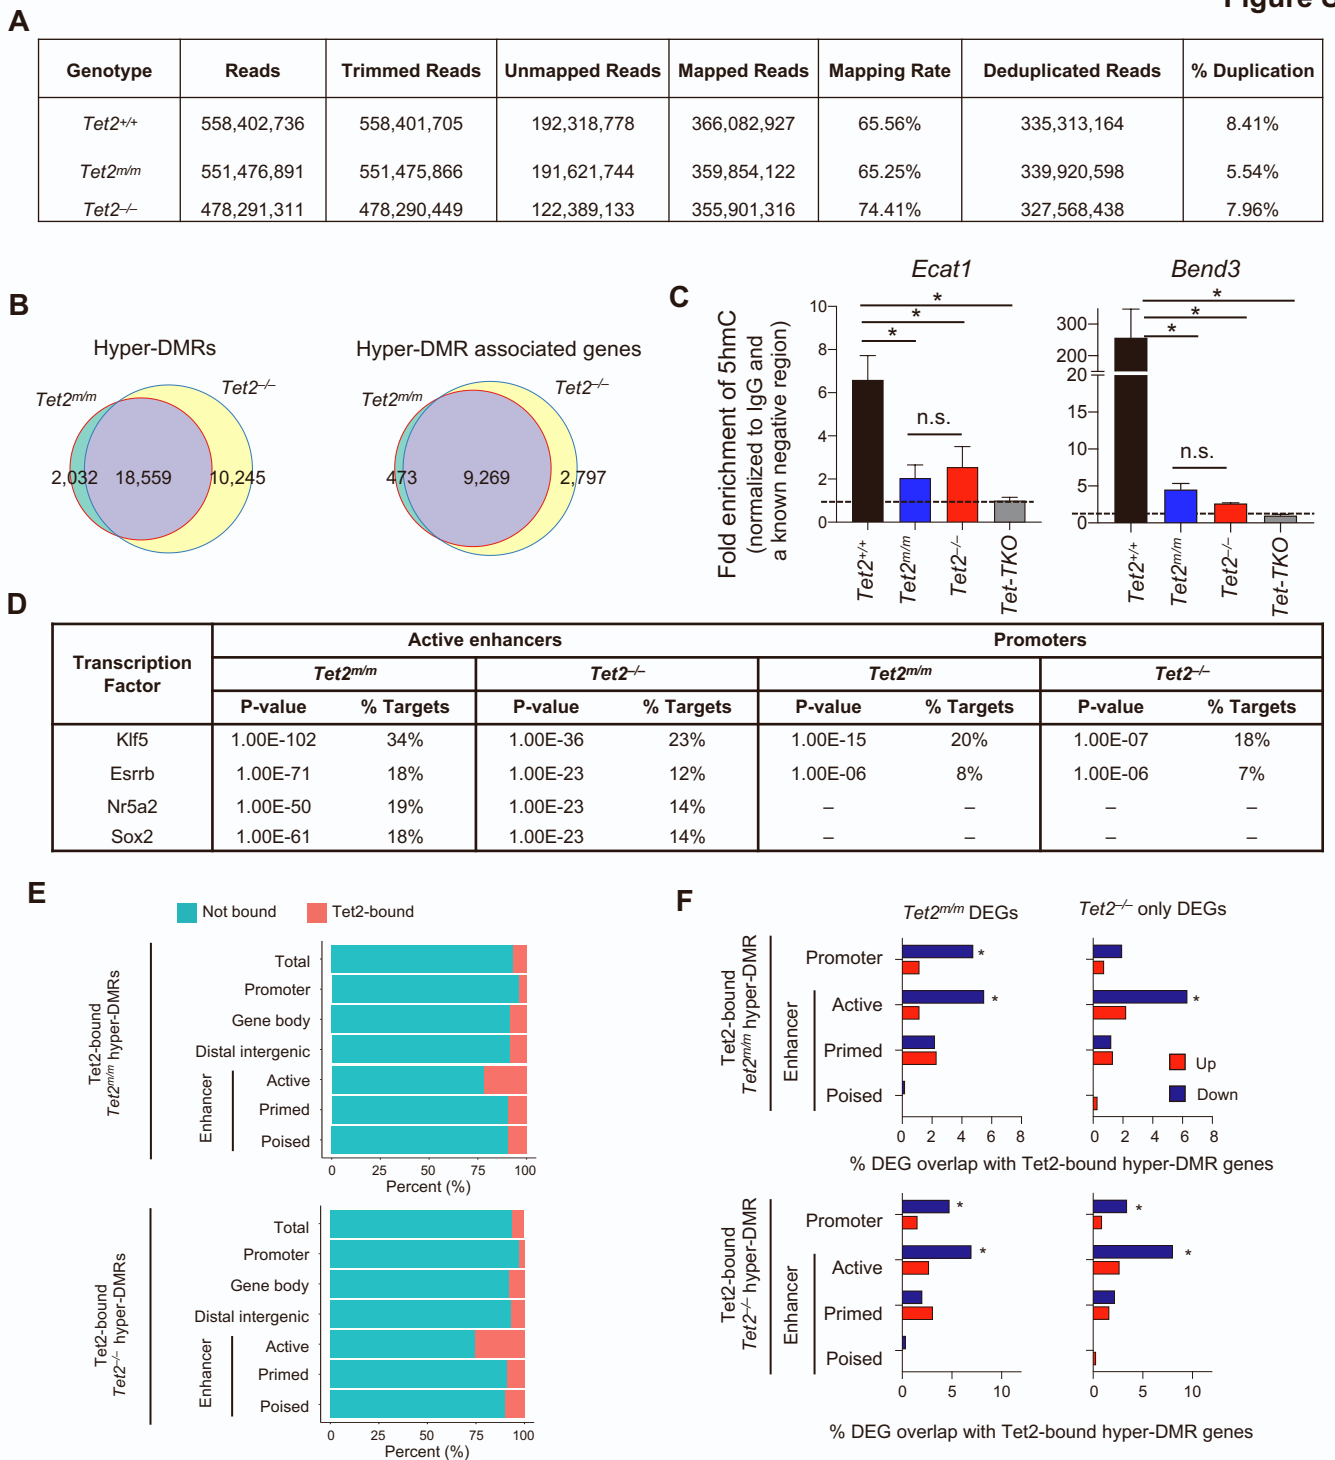

**Figure S3. Mapping DNA methylation levels in *Tet2*<sup>mm</sup> and *Tet2*<sup>-/-</sup> ESCs, related to Figure 3.**

- A. Summary of whole-genome bisulfite sequencing (WGBS) reads.
- B. Venn diagram showing the overlap of hyper-DMRs and their associated genes in *Tet2*<sup>mm</sup> and *Tet2*<sup>-/-</sup> ESCs.
- C. 5hmC levels quantified at selected hyper DMRs by hMeDIP-qPCR. Data normalized to a 5hmC negative region. *Tet1/2/3* TKO ESCs are used as negative control (base line). \*significant than WT. ns= not significant.
- D. Pluripotency transcription factor motifs enriched at promoters and active enhancers hyper-methylated in *Tet2*<sup>mm</sup> and *Tet2*<sup>-/-</sup> ESCs.
- E. Percent Tet2-bound and unbound hyper-DMRs in *Tet2*<sup>mm</sup> and *Tet2*<sup>-/-</sup> ESCs. Note that Tet2-bound hyper-DMRs are enriched for active enhancers.
- F. % DEGs bound by Tet2 and hypermethylated in *Tet2*<sup>mm</sup> and *Tet2*<sup>-/-</sup> ESCs. Note that downregulated DEGs are significantly associated with Tet2-bound promoters & active enhancers (\*  $p < 0.05$  hypergeometric test).

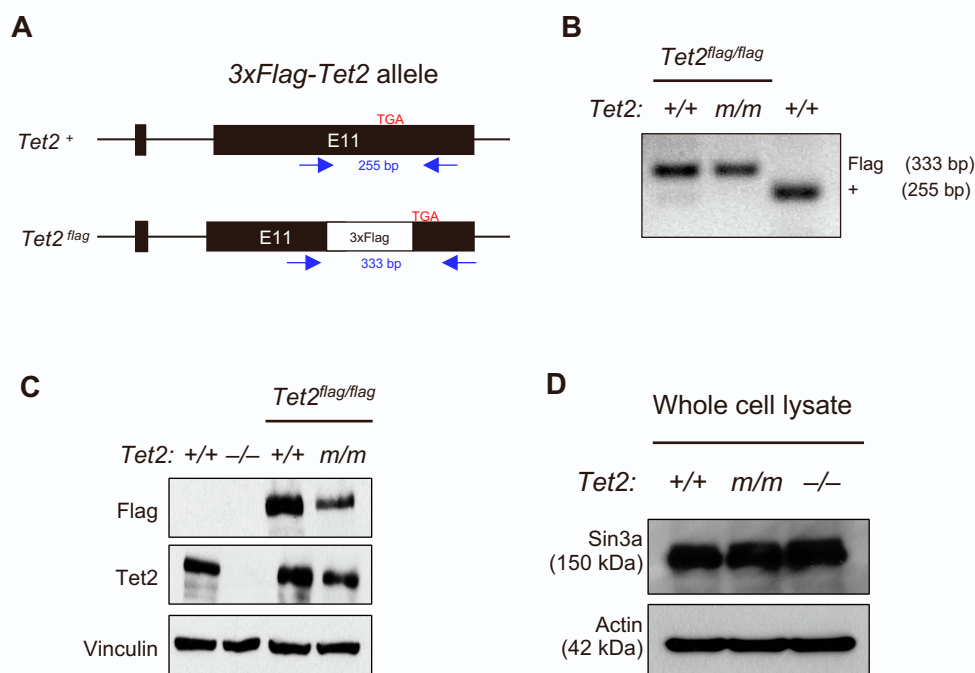

**Figure S4. Generation of endogenously Tet2 Flag-tagged ESCs (*Tet2*<sup>+/+;flag/flag</sup> and *Tet2*<sup>*m/m*;flag/flag</sup> ESCs ) for mapping Tet2 binding partners in ESCs, related to Figure 4.**

- Schematic of knocking in a 3xFlag tag before the stop codon of *Tet2* gene in *Tet2*<sup>+/+</sup> and *Tet2*<sup>*m/m*</sup> ESCs.
- Genotyping of properly targeted *Tet2*<sup>+/+;flag/flag</sup> and *Tet2*<sup>*m/m*;flag/flag</sup> ESCs lines by PCR.
- Confirmation of proper expression of Flag-tagged Tet2 protein by Western blot. Vinculin is used as a loading control.
- Sin3a protein levels quantified by Western blot in wildtype, *Tet2*<sup>*m/m*</sup>, and *Tet2*<sup>-/-</sup> ESCs. Actin is used as loading control.

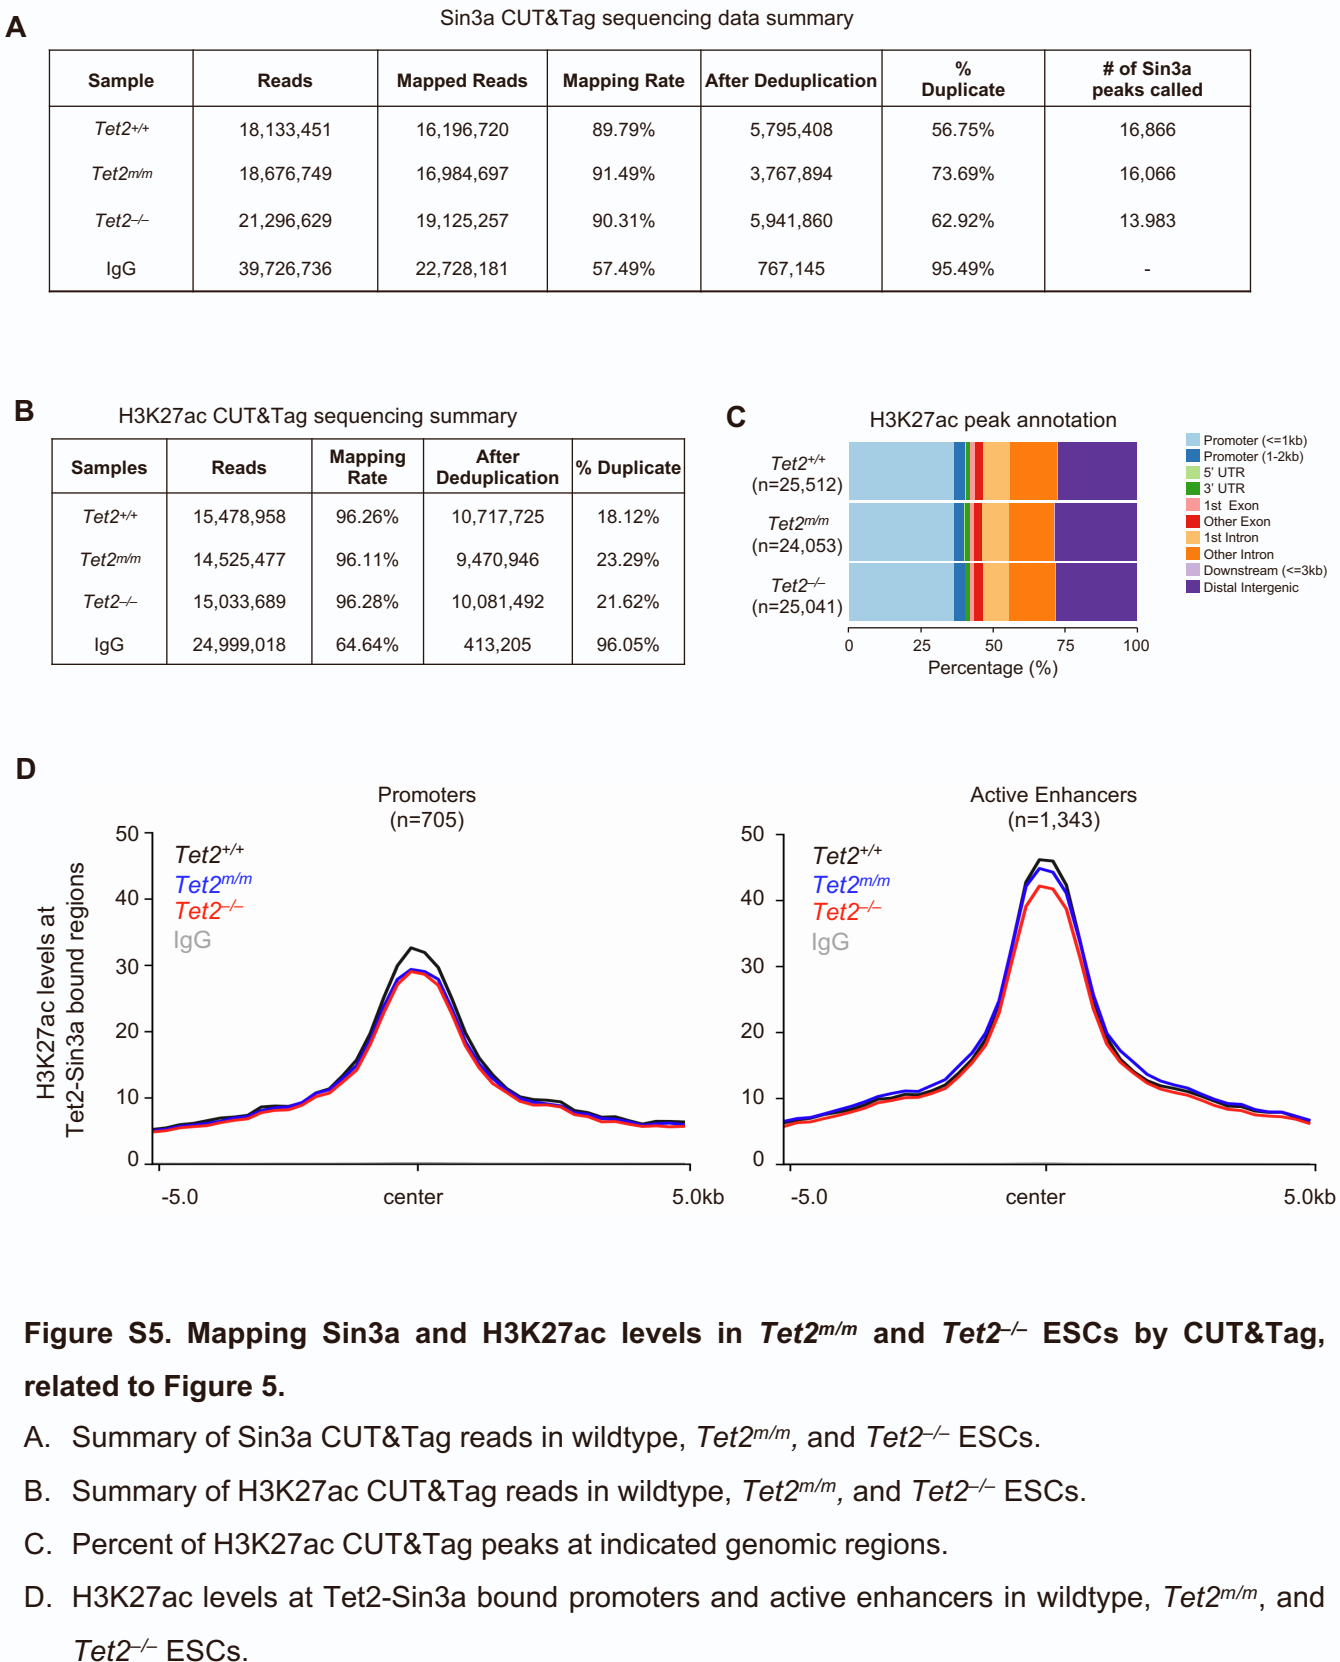

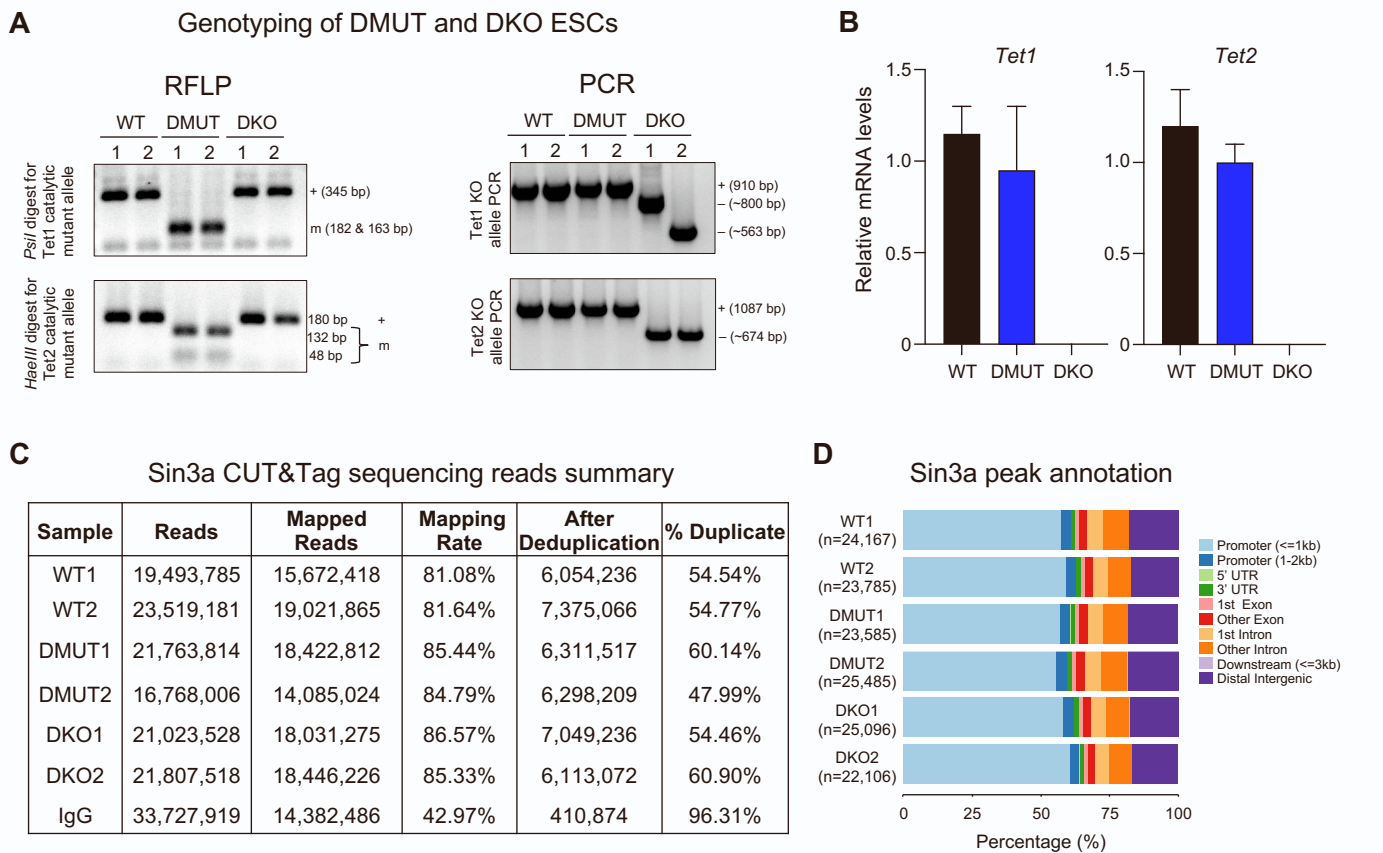

**Figure S6. Characterization of *Tet1<sup>m/m</sup>;Tet2<sup>m/m</sup>* (DMUT) and *Tet1<sup>-/-</sup>;Tet2<sup>-/-</sup>* (DKO) ESCs, related to Figure 5.**

A. RFLP and PCR showing correct targeting of *Tet2* loci in published *Tet1<sup>m/m</sup>* and *Tet1<sup>-/-</sup>* ESCs for generating *Tet1<sup>m/m</sup>;Tet2<sup>m/m</sup>* (DMUT) and *Tet1<sup>-/-</sup>;Tet2<sup>-/-</sup>* (DKO) ESCs.

B. Expression of *Tet1* and *Tet2* in DMUT and DKO ESCs quantified by RTqPCR. Data normalized to *Gapdh*. Error bars = SD

C. Summary of Sin3a CUT&Tag reads in wildtype, DMUT, and DKO ESCs (n=2 of each genotype).

D. Percent of Sin3a peaks annotated to indicated genomic regions in wildtype, DMUT, and DKO ESCs.
